# Supplementary material for: CCR6 Deficiency Impairs IgA Production and Dysregulates Antimicrobial Peptide Production, Altering the Intestinal Flora
Source: PubMed Central journal article supplement (PMC5504188; doi:10.3389/fimmu.2017.00805), 2017-07-11
Supplement: Data_Sheet_1.pdf [file Data_Sheet_1.pdf]

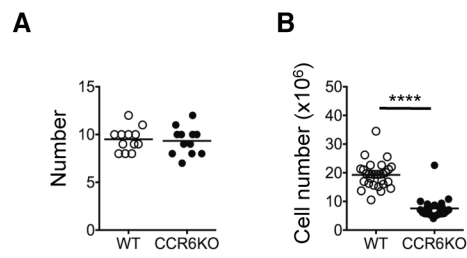

**Supplementary Figure S1. CCR6<sup>-/-</sup> mice have small size of PPs.** Mice were sacrificed and PPs were isolated from small intestines. **A.** Number of PPs in one mouse is shown. **B.** Total lymphocyte number of PPs in one mouse is shown. Each symbol represents one mouse. Data are a compilation of three (**A**) or six (**B**) independent experiments. \*\*\*\*,  $P < 0.0001$ .

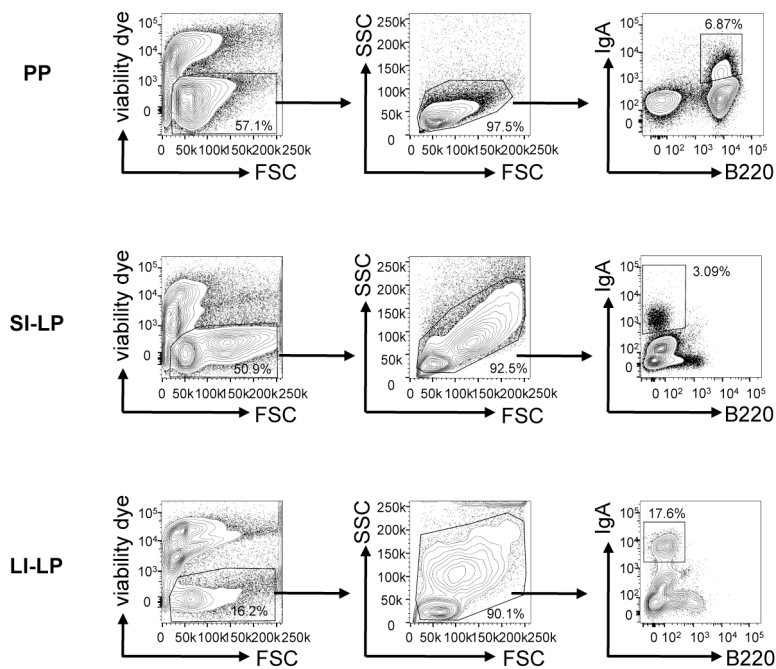

**Supplementary Figure S2. Gating strategy to detect IgA-bearing cells in the intestinal tissues.** Dead cells were excluded using a viability dye. Leukocytes were gated using a FSC vs. SSC plot. IgA-bearing B cells (IgA<sup>+</sup>B220<sup>+</sup> in PP) and IgA-bearing plasma cells (IgA<sup>+</sup>B220<sup>-</sup> in SI-LP and LI-LP) were further identified by surface staining of B220 and IgA.

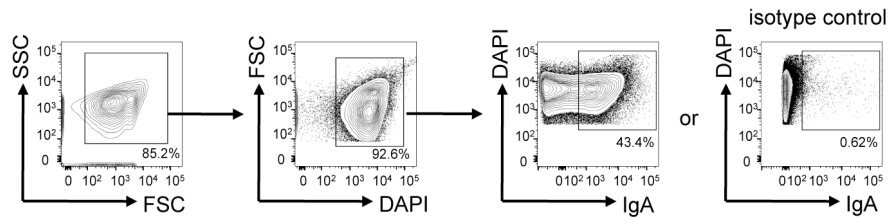

**Supplementary Figure S3. Gating strategy to detect IgA-coated fecal bacteria.** Bacteria were gated using a FSC vs. SSC plot and DAPI positive events were gated for further analysis. Bacteria coated with mouse IgA were identified by IgA-positive events. IgA isotype control (far right panel) was also included for each bacteria sample.

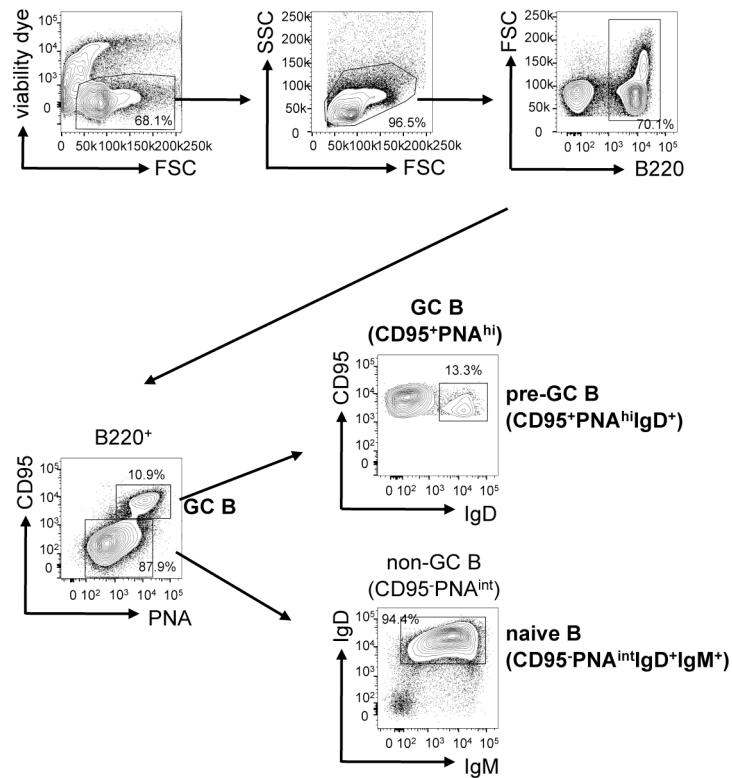

**Supplementary Figure S4. Gating strategy to detect naive B, pre-GC B and GC B cells by staining cells with antibodies to B220, IgD, IgM, CD95 and PNA.** Dead cells were excluded using a viability dye. PP lymphocytes were gated using a FSC vs. SSC plot. B220<sup>+</sup> cells were identified as PP B cells. Within B220<sup>+</sup> population, cells were further identified as GC B cells (CD95<sup>+</sup>PNA<sup>hi</sup>) and non-GCB cells (CD95<sup>-</sup>PNA<sup>int</sup>). Pre-GC B cells were further identified as IgD<sup>+</sup> cells within GC B cells. Naive B cells were further identified as IgD<sup>+</sup>IgM<sup>+</sup> cells within non GC-B cells.

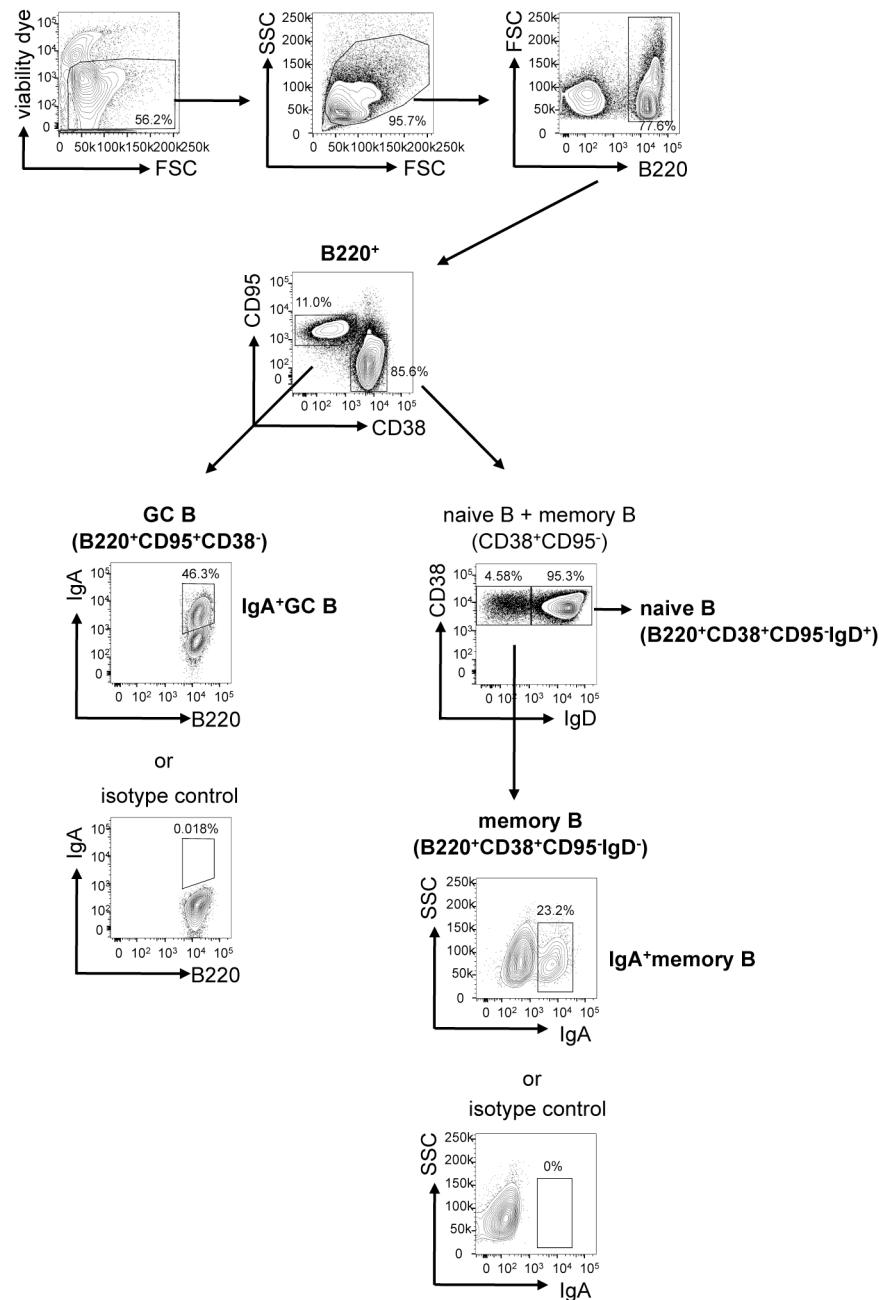

**Supplementary Figure S5. Gating strategy to detect naive B, GC B, IgA-bearing GC B and IgA-bearing memory B cells by staining cells with antibodies to B220, IgD, CD95, CD38 and surface IgA.** Dead cells were excluded using a viability dye. PP lymphocytes were gated using a FSC vs. SSC plot. B220<sup>+</sup> cells were identified as PP B cells. PP B cells were further identified as GC B cells (CD95<sup>+</sup>CD38<sup>-</sup>) or naive and memory B cells (CD95<sup>-</sup>CD38<sup>+</sup>). IgA<sup>+</sup> GC B cells were further identified within GC B cells. Naive B cells were further identified as IgD<sup>+</sup> cells within the CD95<sup>-</sup>CD38<sup>+</sup> population and memory B cells were further identified as IgD<sup>-</sup> cells within the CD95<sup>-</sup>CD38<sup>+</sup> population. IgA<sup>+</sup> memory B cells were identified as surface IgA<sup>+</sup> within the memory B cell population.

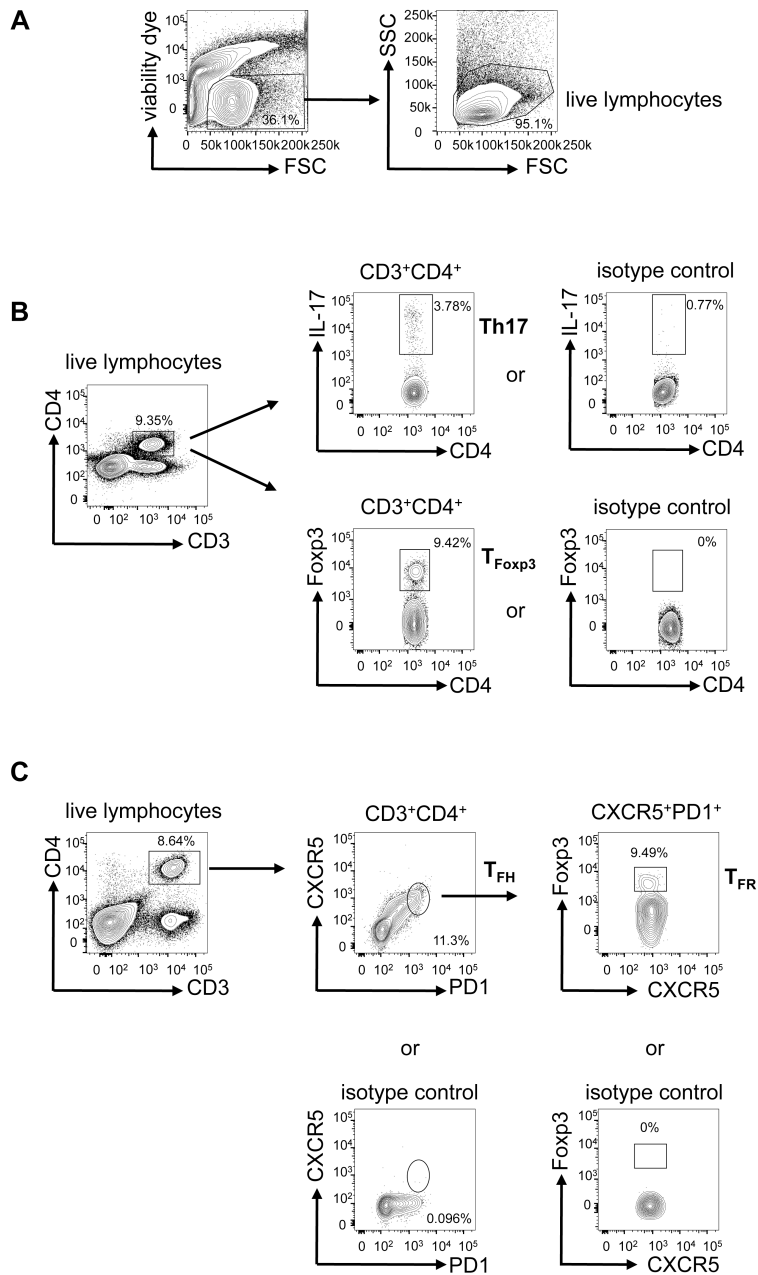

**Supplementary Figure S6. Gating strategy to detect PP T cell subsets.** **A.** Dead cells were excluded using a viability dye. PP lymphocytes were gated using a FSC vs. SSC plot. **B.** CD4<sup>+</sup> T helper cells were gated on CD3<sup>+</sup>CD4<sup>+</sup> cells within the lymphocyte population. Th17 cells were further identified as CD3<sup>+</sup>CD4<sup>+</sup>IL-17<sup>+</sup> T cells and the isotype control for anti-IL-17 was also included. T<sub>Foxp3</sub> cells were further identified as CD3<sup>+</sup>CD4<sup>+</sup>Foxp3<sup>+</sup> cells and the isotype control for anti-Foxp3 was also included. **C.** T<sub>FH</sub> cells were identified as CD3<sup>+</sup>CD4<sup>+</sup>CXCR5<sup>+</sup>PD1<sup>+</sup> cells, and T<sub>FR</sub> cells were further gated on Foxp3<sup>+</sup> cells within the T<sub>FH</sub> population. The isotype controls for anti-CXCR5 and for anti-Foxp3 were also included.

**Supplement Table S1. Primer sequences and the Taqman probes used in this study.**

**(A) Primer sequences used for qPCR**

| <b>murine gene</b> | <b>forward</b>            | <b>reverse</b>             |
|--------------------|---------------------------|----------------------------|
| Reg3 $\beta$       | ATGGCTCCTACTGCTATGCC      | GTGTCCTCCAGGCCTCTTT        |
| Reg3 $\gamma$      | ATGGCTCCTATTGCTATGCC      | GATGTCCTGAGGGCCTCTT        |
| SAA1               | CATTTGTTACGAGGCTTTCC      | GTTTTTCCAGTTAGCTTCCTTCATGT |
| SAA2               | TGTGTATCCCACAAGGTTTCAGA   | TTATTACCCTCTCCTCCTCAAGCA   |
| CCL20              | TACGACTGTTGCCTCTCGTACATAC | TCTGTGCAGTGATGTGCAGGTGAA   |
| CXCL13             | TTACGCCCCCTGGGAATGGCT     | GGGTATGCAACGGAGCTTGAGCA    |
| CD79 $\alpha$      | GAACCACAGGGGCTTGTACT      | GGTTCTTGGTACCTTCCCCC       |
| LT $\alpha$        | TCCACTCCCTCAGAAGCACT      | AGAGAAGCCATGTTCGGAGAA      |
| LT $\beta$         | TACACCAGATCCAGGGGTTCC     | ACTCATCCAAGCGCCTATGA       |
| TGF- $\beta$ 1     | AAGGCTCGCCAGTCCCCCAA      | TAGATGGCGTTGTTGCGGTCCAC    |
| IL-21              | AGGGCCAGATCGCCTCCTGA      | GCATGCTCACAGTGCCCCTTTACA   |
| BAFF               | AGGCTGGAAGAAGGAGATGAG     | CAGAGAAGACGAGGGGAAGGG      |
| APRIL              | GGGGAAGGAGTGTCAGAGTG      | GCAGGGAGGGTGGGAATAC        |
| GAPDH              | TACTTGGCAGGTTTCTCCAG      | GTCGTGGAGTCTACTGGTGT       |

**(B) Gene expression analyzed with Taqman probes**

| <b>murine gene</b> | <b>Taqman probe</b> |
|--------------------|---------------------|
| IL-22              | Mm04203745_mH       |
| IL-17A             | Mm00439618_m1       |
| RORc               | Mm01261022_m1       |
| IL-10              | Mm00439614_m1       |
| IL-6               | Mm00446190_m1       |
| GM-CSF             | Mm01290062_m1       |
| GAPDH              | Mm99999915_g1       |
